# Supplementary material
Source: ML conference proceedings conference paper supplement (https://proceedings.neurips.cc/paper_files/paper/2022/hash/d46662aa53e78a62afd980a29e0c37ed-Abstract.html)
Supplement: Supplementary file 1 [file d46662aa53e78a62afd980a29e0c37ed-Supplemental-Conference.pdf]

---

# Supplementary Material: Unified Vision-Language Pre-Training with Mixture-of-Modality-Experts

---

Hangbo Bao<sup>1\*</sup>, Wenhui Wang<sup>2</sup>, Li Dong<sup>2</sup>, Qiang Liu<sup>2</sup>, Owais Khan Mohammed<sup>2</sup>,  
Kriti Aggarwal<sup>2</sup>, Subhojit Som<sup>2</sup>, Songhao Piao<sup>1</sup>, Furu Wei<sup>2</sup>

<sup>1</sup>Harbin Institute of Technology, <sup>2</sup>Microsoft Corporation  
<https://aka.ms/msragi>

## A Supplementary Experiments

### A.1 Ablation Study of Multiway Transformer

Table 1 presents the ablation study of shared self-attention module used in Multiway Transformer for encoding image patches and text tokens. We compare shared self-attention with separate self-attention, which encodes image patches and text tokens using different attention parameters on the first L–F layers. The shared self-attention used in Multiway Transformer achieves better performance. The shared self-attention module helps VLMO learn the alignment of different modalities, and fuse images and text at bottom layers for classification tasks.

### A.2 Evaluation on Retrieval Task with Rerank

Following ALBEF [1] and BLIP [2], we conduct experiments on retrieval tasks with rerank. We perform finetuning with image-text contrastive and image-text matching losses. During inference, VLMO is first used as a dual encoder to obtain top- $k$  candidates, then the model is used as a fusion encoder to rerank the candidates. As shown in Table 2, VLMO-Large achieves competitive performance compared with BLIP which uses more data.

## B Supplementary Hyperparameters

### B.1 Hyperparameters for Pre-Training

The vision-language pre-training of base-size model takes about two days using 64 Nvidia Tesla V100 32GB GPU cards, and the large-size model takes about three days using 128 Nvidia Tesla V100 32GB GPU cards.

For the text-only pre-training data, we use English Wikipedia and BookCorpus [5]. AdamW [3] optimizer with  $\beta_1 = 0.9$ ,  $\beta_2 = 0.98$  is used to train the models. The maximum sequence length is set to 196. The batch size is 1024, and the peak learning rate is  $2e-4$ . We set the weight decay to 0.01. For the base-size model, we train the model for 500k steps. The large-size model is trained for 200k steps.

### B.2 Hyperparameters for Vision-Language Classification Fine-Tuning

**Visual Question Answering (VQA)** We fine-tune the models for 10 epochs with 128 batch size. The peak learning rate is  $3e-5$  for the base-size model, and  $1.5e-5$  for the large-size model. Following SimVLM [4], the input image resolution is  $480 \times 480$ . For VLMO-Large++, we use  $768 \times 768$  image resolution. Using  $768 \times 768$  resolution brings about 0.3 improvement than  $480 \times 480$  resolution.

---

\*Contribution during internship at Microsoft.

| Transformer                                         | NLVR2        |              | Flickr30k    |              |
|-----------------------------------------------------|--------------|--------------|--------------|--------------|
|                                                     | dev          | test-P       | TR           | IR           |
| Separate Self-Attention                             | 78.92        | 78.95        | 94.63        | 86.88        |
| <b>Multiway Transformer (Shared Self-Attention)</b> | <b>80.13</b> | <b>80.31</b> | <b>95.17</b> | <b>87.25</b> |

Table 1: Ablation study of the shared self-attention module used in Multiway Transformer. We experiment with separate attention on the first L–F layers, which encodes image patches and text tokens using different attention parameters.

| Model             | # Pretrain Images | Flickr30K (1K test set) |             |              |             |             |             |
|-------------------|-------------------|-------------------------|-------------|--------------|-------------|-------------|-------------|
|                   |                   | TR                      |             |              | IR          |             |             |
|                   |                   | R@1                     | R@5         | R@10         | R@1         | R@5         | R@10        |
| BLIP [2]          | 129M              | 97.4                    | 99.8        | 99.9         | 87.6        | <b>97.7</b> | 99.0        |
| <b>VLMO-Large</b> | 4M                | <b>97.7</b>             | <b>99.9</b> | <b>100.0</b> | <b>87.8</b> | <b>97.7</b> | <b>99.1</b> |

Table 2: Fine-tuning results of text-retrieval (TR) and image-retrieval (IR) with rerank on Flickr30K.

**Natural Language for Visual Reasoning (NLVR2)** For results of Table 1, the models are fine-tuned for 10 epochs with 128 batch size. The peak learning rate of the base-size and large-size models are set to  $5e-5$  and  $3e-5$ , respectively. The input image resolution is  $384 \times 384$ . For ablation experiments, we fine-tune the models for 10 epochs with 128 batch size, and choose learning rates from  $\{5e-5, 1e-4\}$ . The input image resolution is  $224 \times 224$ . All the ablation results of NLVR2 are averaged over 3 runs.

### B.3 Hyperparameters for Vision-Language Retrieval Fine-Tuning

**COCO** We fine-tune the base-size model for 20 epochs and large-size model for 10 epochs with 2048 batch size. The peak learning rate is  $2e-5$  for the base-size model and  $1e-5$  for the large-size model. The input image resolution is  $384 \times 384$ .

**Flickr30K** For results of Table 2, the base-size and large-size models are fine-tuned for 40 epochs with a batch size of 2048 and a peak learning rate of  $1e-5$ . We use the fine-tuned model on COCO as the initialization. The input image resolution is  $384 \times 384$ . For all ablation experiments, we fine-tune the models for 10 epochs with 1024 batch size. The peak learning rate is set to  $5e-5$ , and the input image resolution is  $224 \times 224$ .

## References

- [1] Junnan Li, Ramprasaath R. Selvaraju, Akhilesh Deepak Gotmare, Shafiq R. Joty, Caiming Xiong, and Steven C. H. Hoi. Align before fuse: Vision and language representation learning with momentum distillation. *CoRR*, abs/2107.07651, 2021. URL <https://arxiv.org/abs/2107.07651>.
- [2] Junnan Li, Dongxu Li, Caiming Xiong, and Steven C. H. Hoi. BLIP: bootstrapping language-image pre-training for unified vision-language understanding and generation. In Kamalika Chaudhuri, Stefanie Jegelka, Le Song, Csaba Szepesvári, Gang Niu, and Sivan Sabato, editors, *International Conference on Machine Learning, ICML 2022, 17-23 July 2022, Baltimore, Maryland, USA*, volume 162 of *Proceedings of Machine Learning Research*, pages 12888–12900. PMLR, 2022.
- [3] Ilya Loshchilov and Frank Hutter. Decoupled weight decay regularization. In *7th International Conference on Learning Representations, ICLR 2019, New Orleans, LA, USA, May 6-9, 2019*. OpenReview.net, 2019.
- [4] Zirui Wang, Jiahui Yu, Adams Wei Yu, Zihang Dai, Yulia Tsvetkov, and Yuan Cao. Simvlm: Simple visual language model pretraining with weak supervision. *CoRR*, abs/2108.10904, 2021. URL <https://arxiv.org/abs/2108.10904>.

- [5] Yukun Zhu, Ryan Kiros, Rich Zemel, Ruslan Salakhutdinov, Raquel Urtasun, Antonio Torralba, and Sanja Fidler. Aligning books and movies: Towards story-like visual explanations by watching movies and reading books. In *Proceedings of the IEEE international conference on computer vision*, pages 19–27, 2015.
